# Supplementary material for: Butyrate dictates ferroptosis sensitivity through FFAR2-mTOR signaling
Source: PubMed Central journal article supplement (PMC10130170; doi:10.1038/s41419-023-05778-0), 2023-04-25

Figure 3A

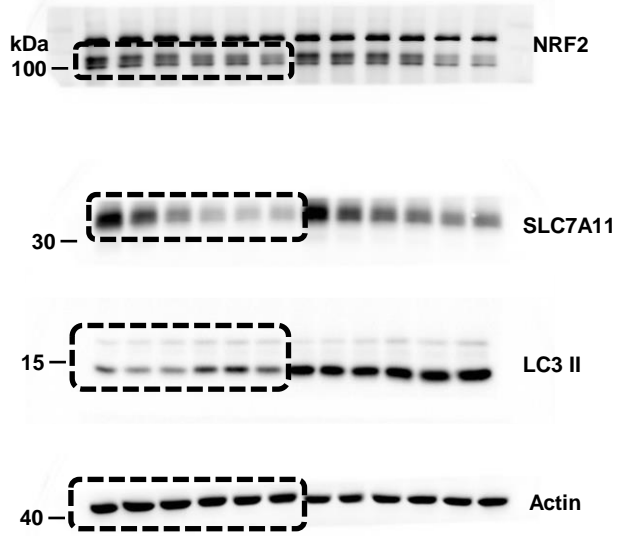

Figure 3D

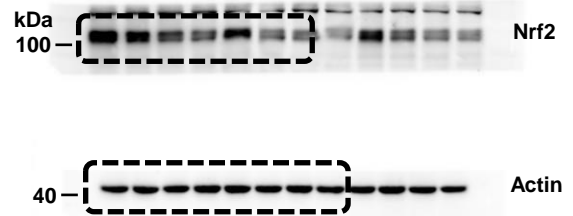

Figure 3F

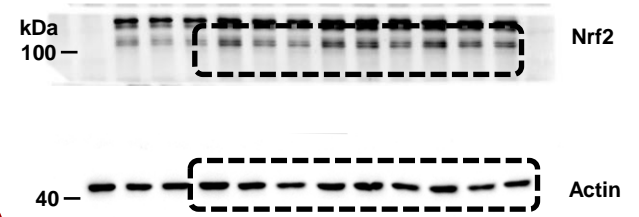

Figure 3I

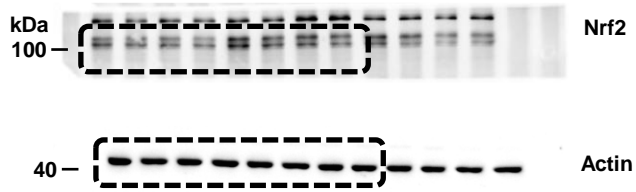

Figure 3K

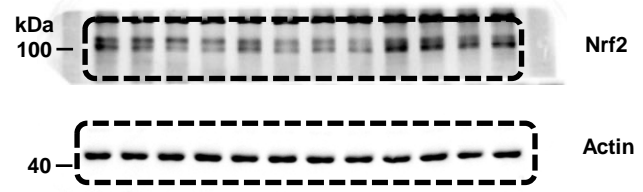

Figure 3M

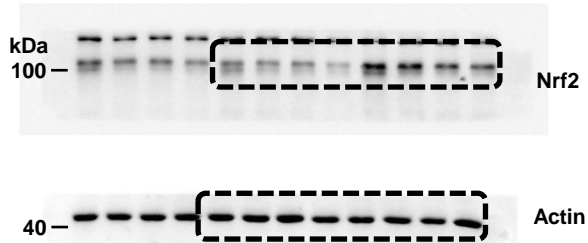

Figure 3O

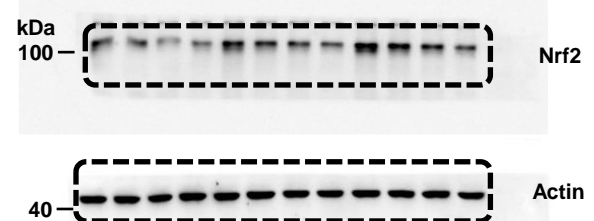

Figure 3R

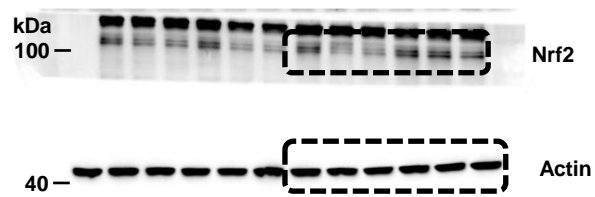

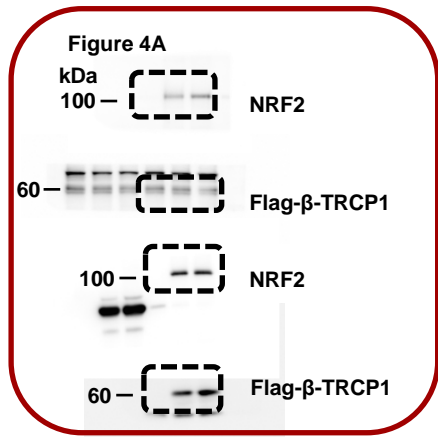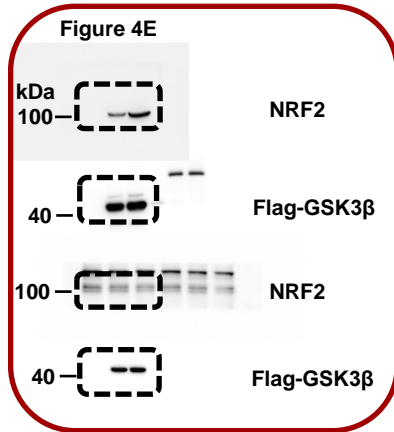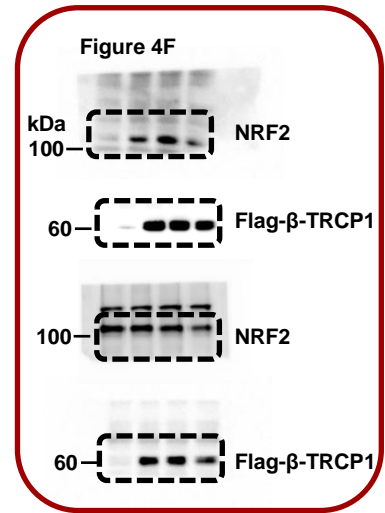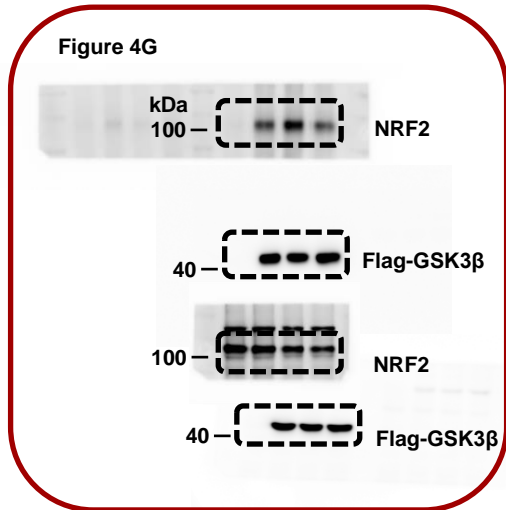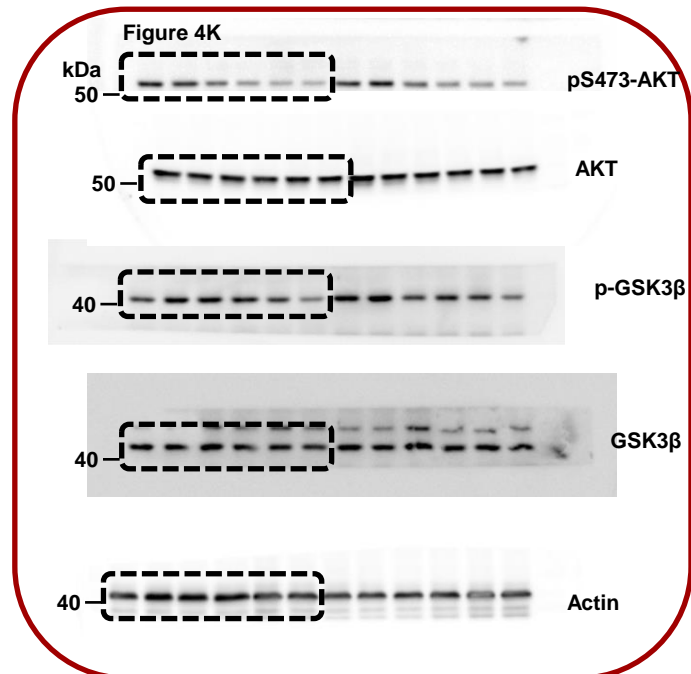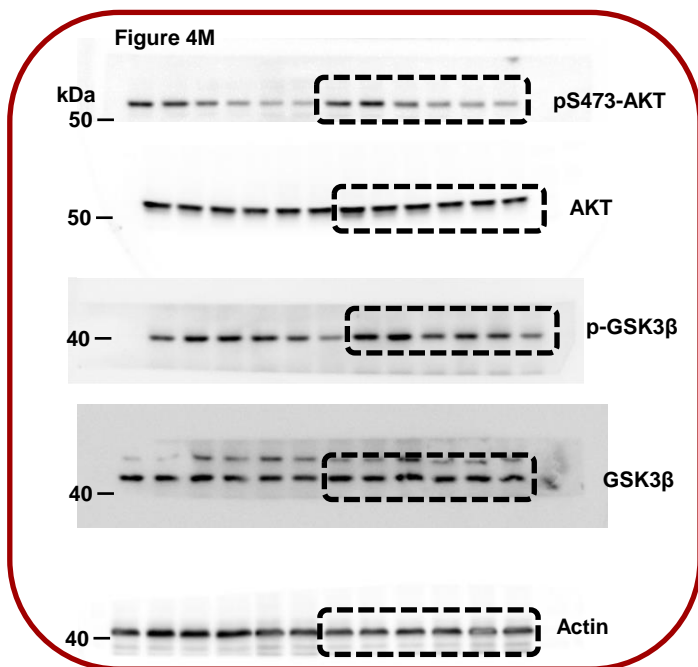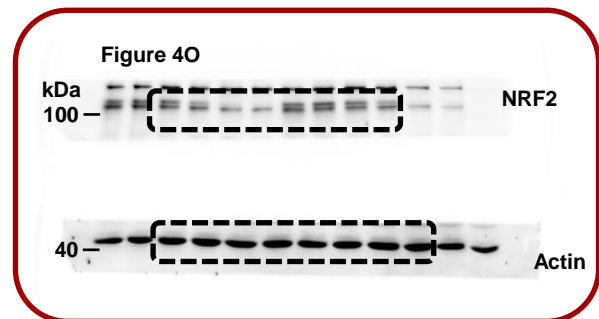

Figure 5A

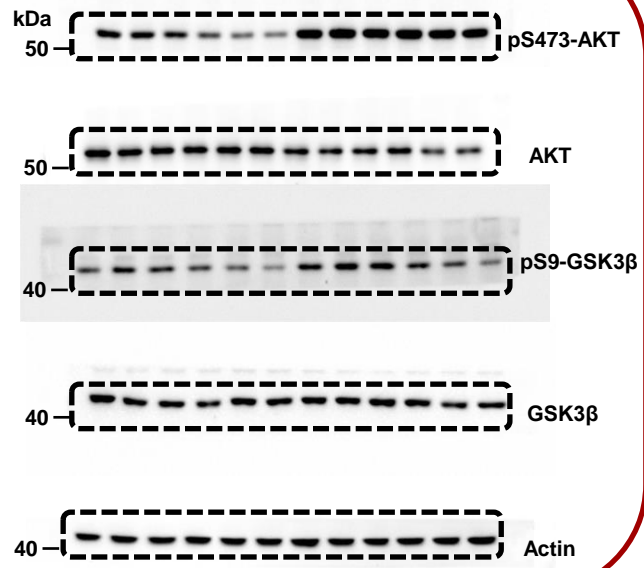

Figure 5E

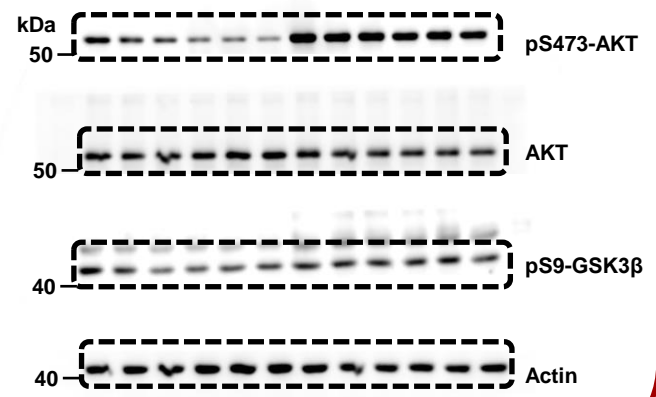

Figure 5G

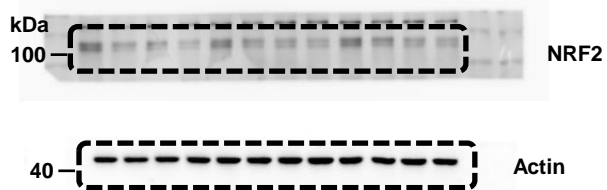

Figure 5J

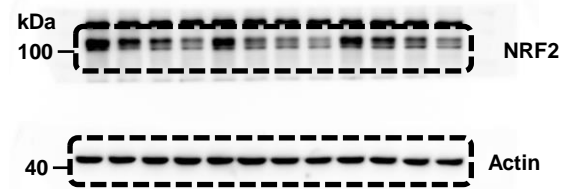

Figure 5L

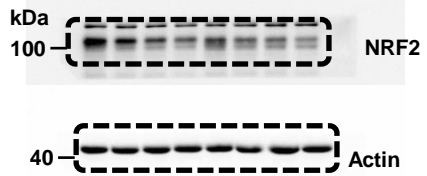

Figure 6B

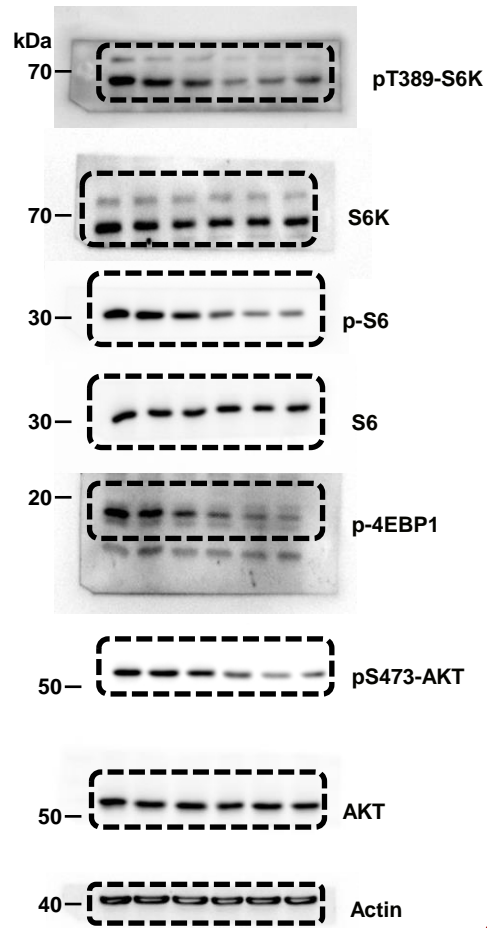

Figure 6D

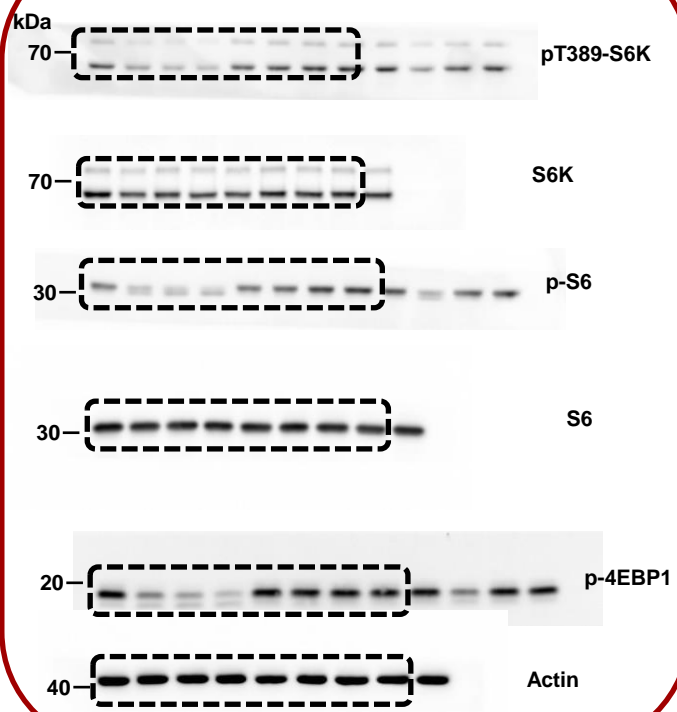

Figure 6G

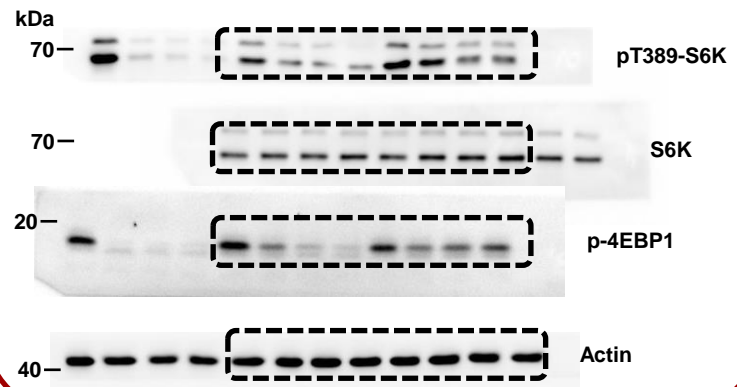

Figure 6I

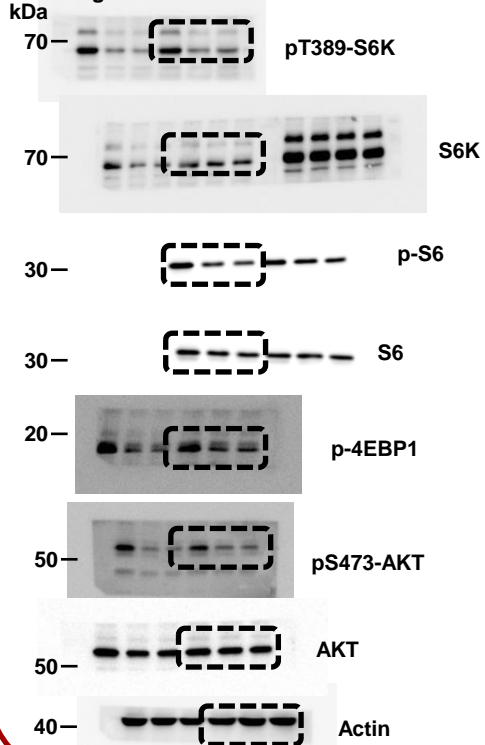

Figure 6K

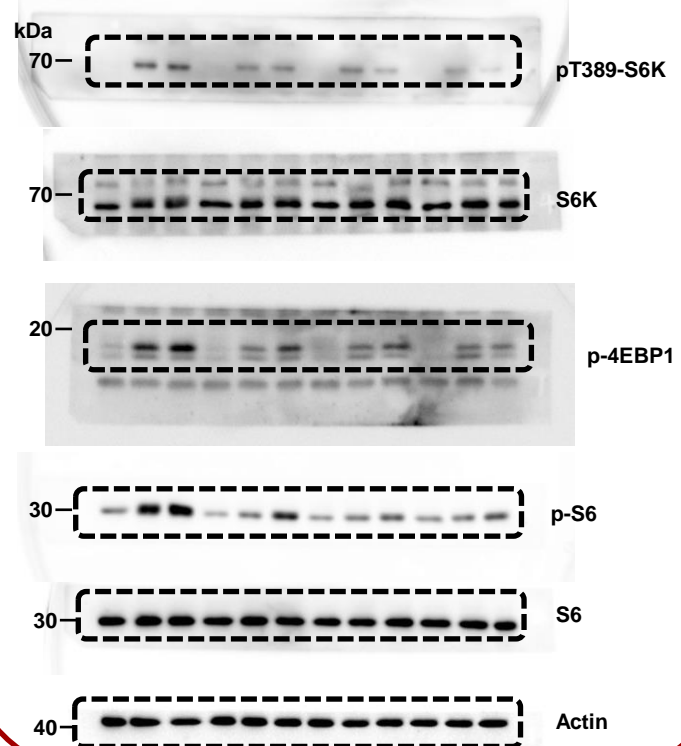

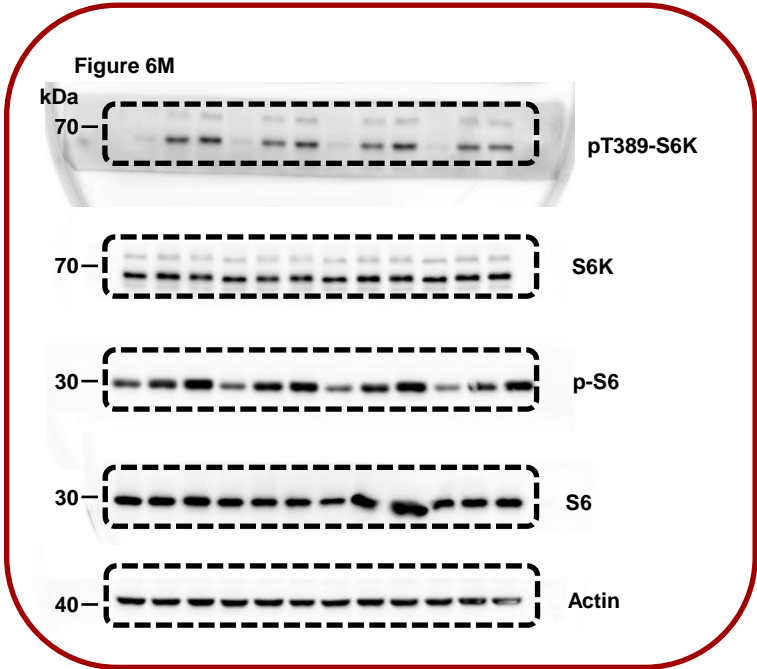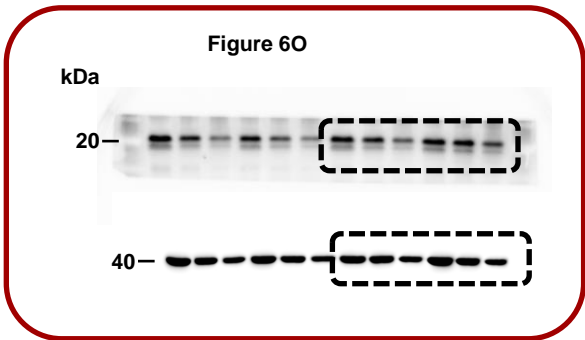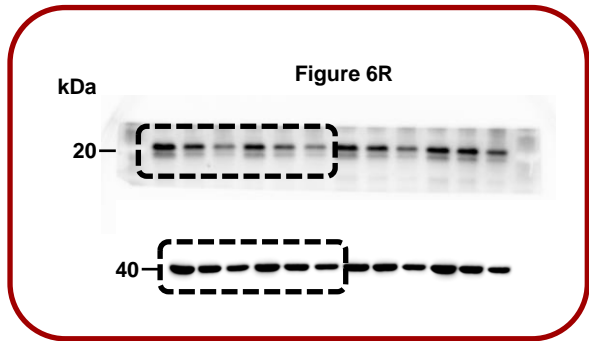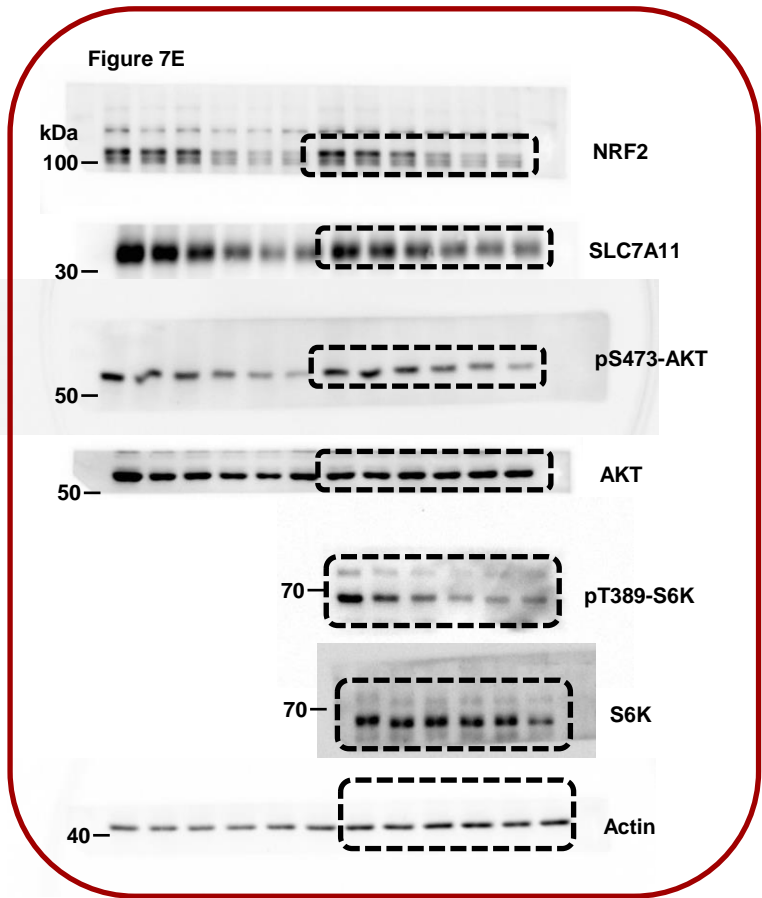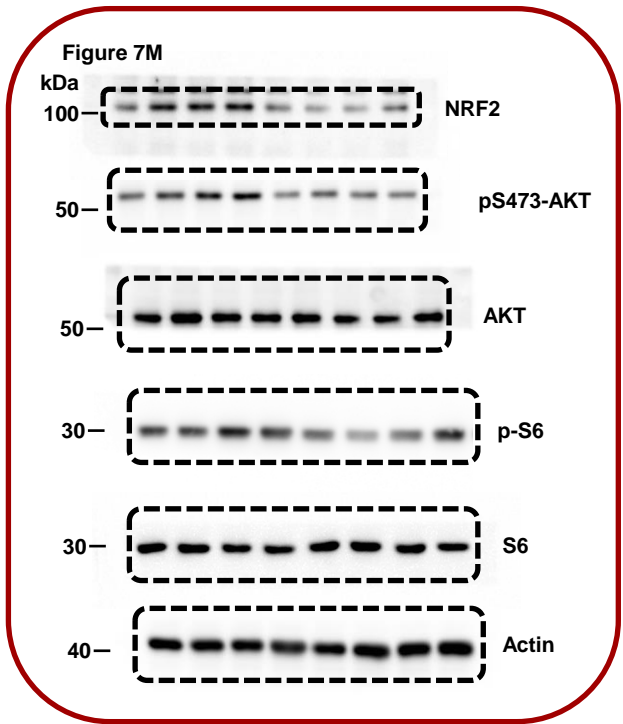

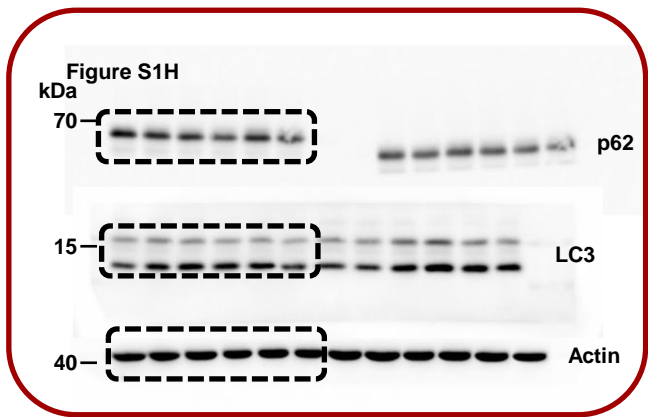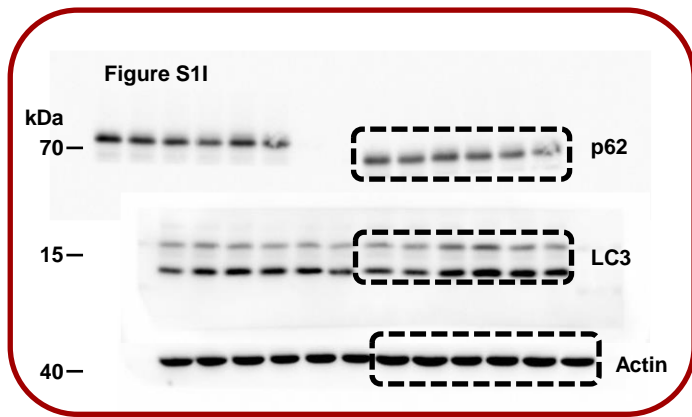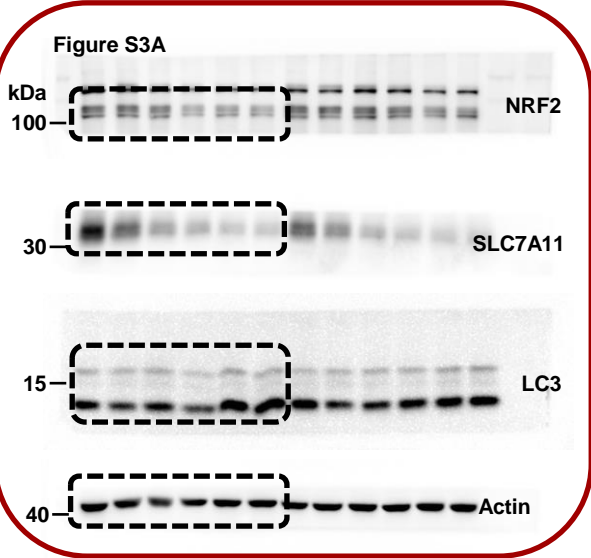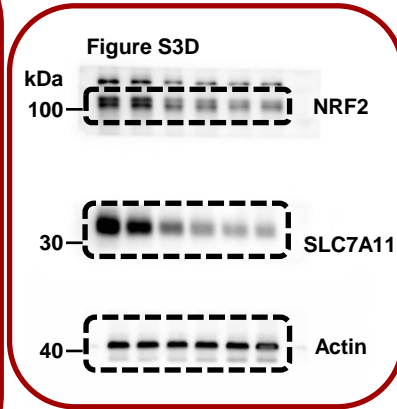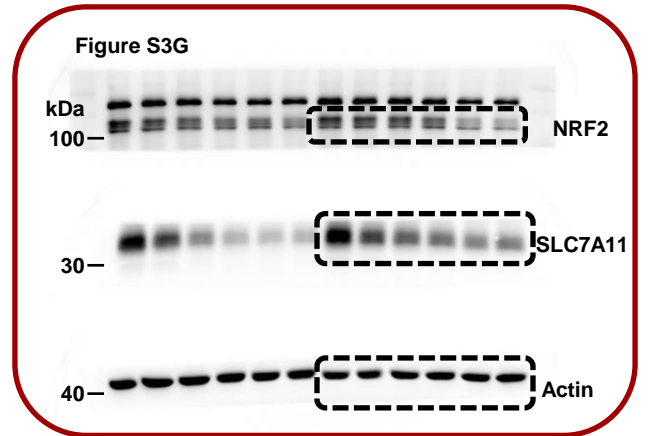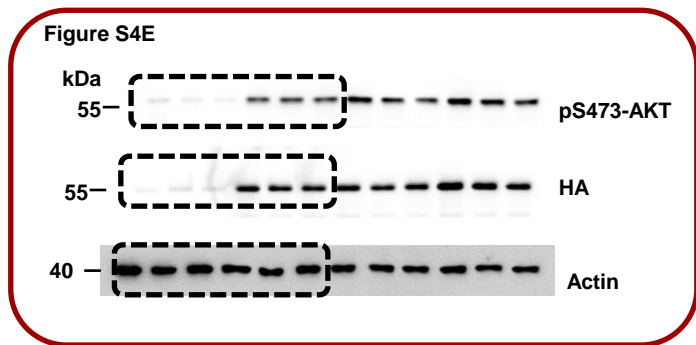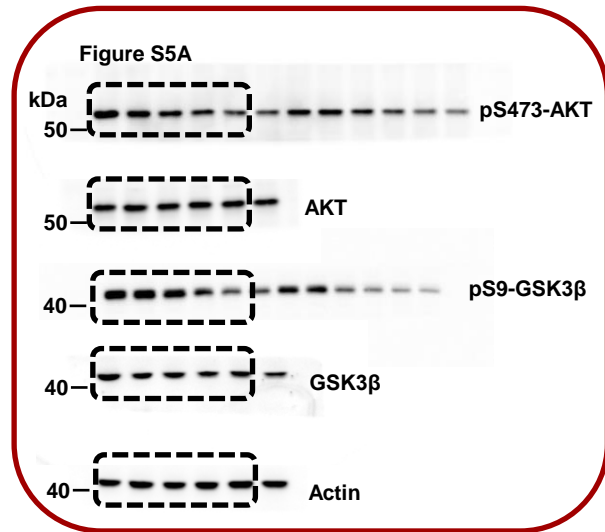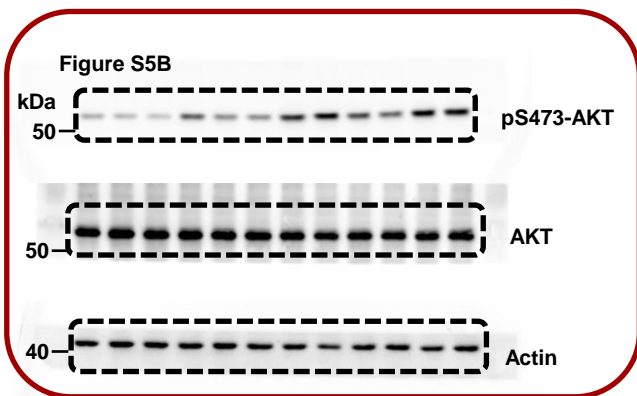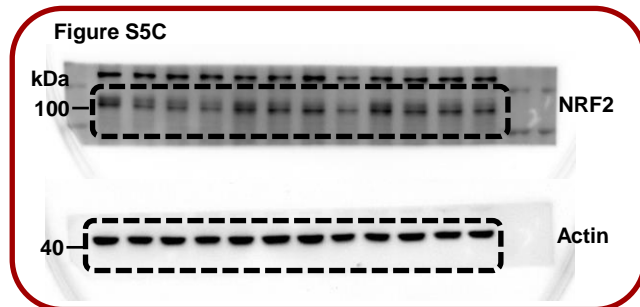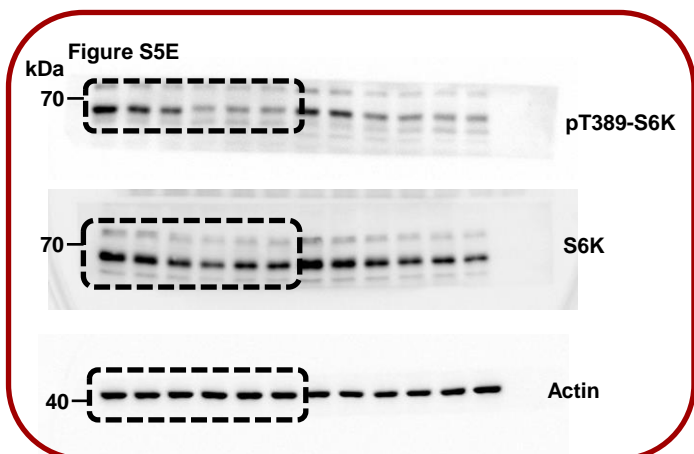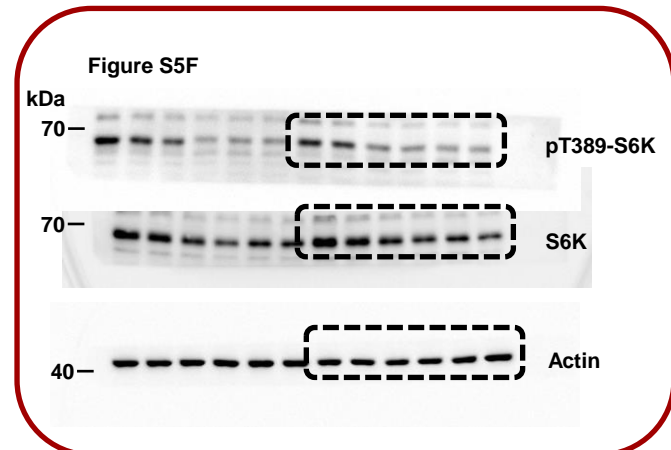

Supplement: 41419_2023_5778_MOESM3_ESM.pdf [file 41419_2023_5778_MOESM3_ESM.pdf]
